# Supplementary material for: Brain tissue transcriptomic analysis of SIV-infected macaques identifies several altered metabolic pathways linked to neuropathogenesis and poly (ADP-ribose) polymerases (PARPs) as potential therapeutic targets
Source: Springer Nature journal article supplement (doi:10.1007/s13365-020-00927-z), 2021-01-06

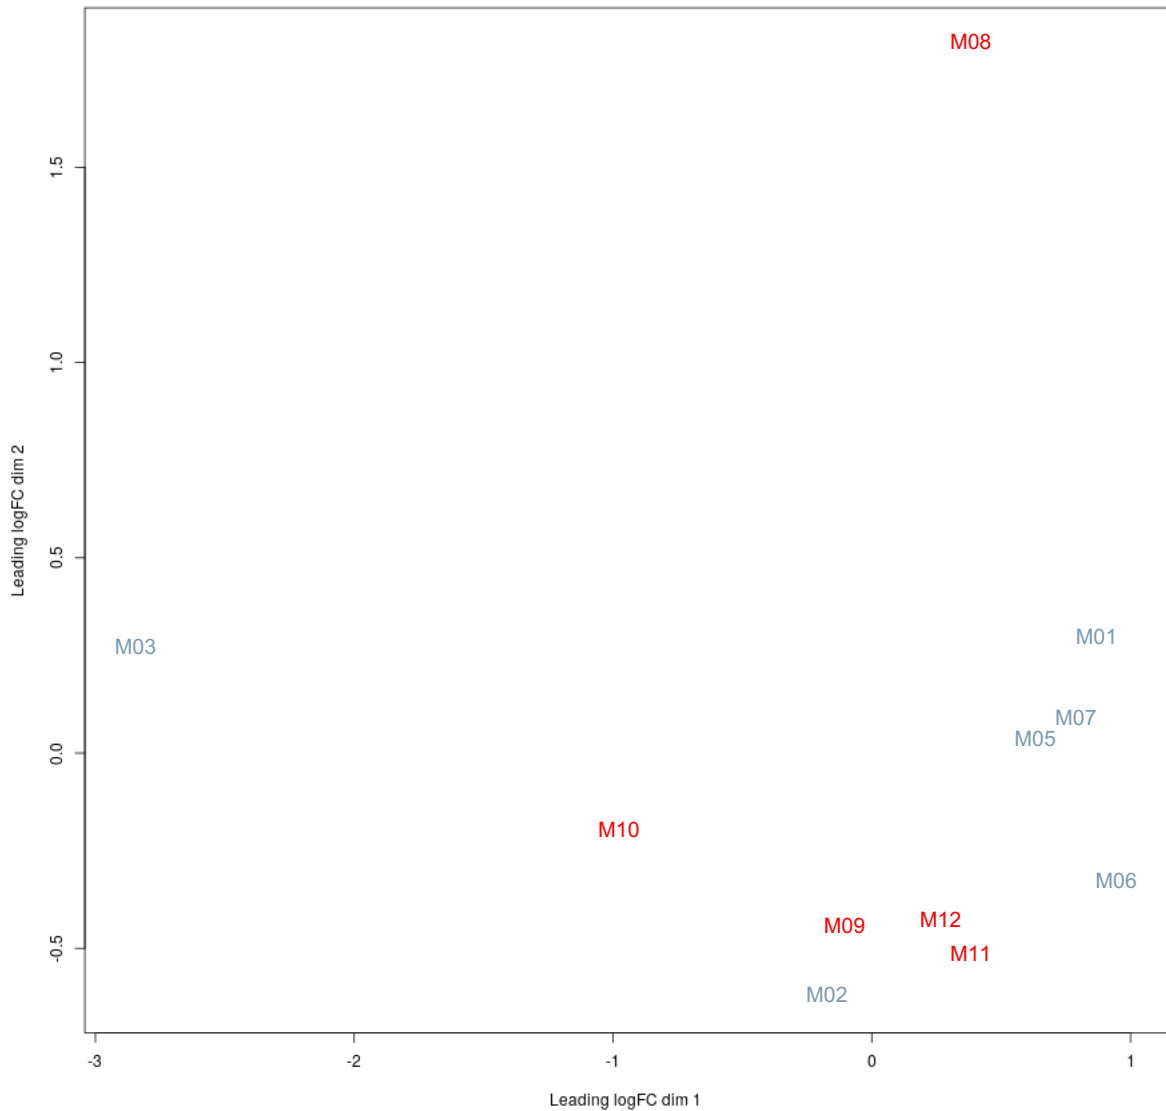

Supplement: MOESM1 [file 18740606]
